# Supplementary material for: Local axonal morphology guides the topography of interneuron myelination in mouse and human neocortex
Source: eLife. 2019 Nov 19;8:e48615. doi: 10.7554/eLife.48615 (PMC6927753; doi:10.7554/eLife.48615)
Supplement: Figure 1—source data 1. [file elife-48615-fig1-data1.xlsx]

## Sheet: 1f
	1f
			Axonal Segments
		Diameter	0.431
		(µm)	0.577
			0.288
			0.31
			0.516
			0.421
			0.165
			0.379
			0.395
			0.175
			0.178
			0.44
			0.204
			0.164
			0.39
			0.397
			0.199
			0.225
			0.793
			0.638
			0.766
			0.512
			0.371
			0.35
			0.529
			0.472
			0.351
			0.474
			0.331
			0.278
			0.437
			0.221
			0.276
			0.319
			0.29
			0.235
			0.278
			0.711
			0.98
			0.317
			0.473
			0.304
			0.276
			0.464
			0.292
			0.542
			0.26
			0.413
			0.287
			0.477
			0.246
			0.295
			0.313
			0.217
			0.522
			0.481
			0.495
			0.492
			0.362
			0.317
			0.421
			0.283
			0.34
			0.264
			0.272
			0.285
			0.391
			0.29
			0.35
			0.215
			0.248
			0.194
			0.211
			0.399
			0.513
			0.566
			0.4
			0.228
			0.267
			0.29
			0.253
			0.298
			0.228
			0.24
			0.392
			0.214
			0.393
			0.361
			0.328
			0.31
			0.209
			0.303
			0.182
			0.366
			0.271
			0.281
			0.336
			0.292
			0.25
			0.248
			0.263
			0.263
			0.231
			0.237
			0.264
			0.755
			0.369
			0.273
			0.213
			0.305
			0.2
			0.281
			0.416
			0.412
			0.392
			0.234
			0.347
			0.212
			0.193
			0.24
			0.285
			0.266
			0.31
			0.24
			0.393
			0.292
			0.258283
			0.531
			0.551
			0.508
			0.271
			0.297
			0.305
			0.217
			0.452
			0.586
			0.371
			0.256
			0.361
			0.306
			0.295

## Sheet: 1g
	1g
			Branch Order
			1	2	3	4	5	6	7
		Diameter	0.431	0.577	0.288	0.31	0.165	0.178	0.235
		(µm)	0.522	0.638	0.512	0.529	0.474	0.221	0.194
			0.366	0.98	0.473	0.464	0.542	0.413	0.303
			0.755	0.495	0.362	0.421	0.264	0.29	0.393
			0.531	0.566	0.228	0.29	0.24	0.361	0.397
			0.793	0.271	0.336	0.25	0.263	0.237	0.295
			0.711	0.369	0.213	0.416	0.347	0.285	0.211
			0.481	0.551	0.271	0.217	0.256	0.44	0.182
			0.513	0.766	0.371	0.516	0.379	0.276	0.292
				0.317	0.317	0.472	0.331	0.287	0.199
				0.492	0.267	0.292	0.26	0.35	0.313
				0.4	0.292	0.283	0.272	0.328	0.399
				0.281	0.305	0.253	0.392	0.264	0.225
				0.273	0.297	0.248	0.263	0.266	0.278
				0.508	0.35	0.412	0.212	0.295	0.217
					0.304	0.452	0.361	0.204
					0.2	0.421	0.395	0.319
					0.305	0.351	0.278	0.477
					0.276	0.34	0.285	0.215
					0.281	0.298	0.214	0.31
						0.392	0.231	0.31
						0.586	0.193	0.164
						0.228	0.306	0.29
						0.234	0.175	0.246
						0.371	0.437	0.248
							0.391	0.209
							0.393	0.24
							0.24

## Sheet: 1h
	1h
			Boutons
		Diameter	0.7395
		(µm)	0.9762
			0.4699
			0.6993
			0.9284
			0.7246
			0.6284
			0.9289
			0.882
			0.7871
			1.0356
			0.9771
			0.9476
			0.6395
			0.5819
			0.5622
			0.6107
			0.5101
			0.6107
			0.8648
			0.7867
			0.7405
			0.8822
			0.7999
			0.6337
			0.7146
			0.6674
			0.8293
			0.7349
			0.8117
			0.6133
			1.2607
			0.8253
			0.8253
			0.4522
			0.4512
			0.7949
			0.5341
			0.5688
			0.5859
			0.7107
			0.6523
			0.6146
			0.8383
			0.6127
			0.5771
			0.6434
			0.6876
			1.0012
			0.5833
			0.6955
			0.5652
			0.7076
			0.8792
			0.792
			0.6397
			0.5948
			0.9451
			0.6802
			0.6405
			0.7105
			0.8202
			0.6992
			0.7815
			0.6152
			0.7459
			0.6121
			0.8866
			0.651
			0.6872
			0.5937
			0.7362
			0.6992
			0.6736
			0.7697
			0.4483
			0.3371
			0.7636
			0.5552
			0.9395
			0.796
			0.5849
			0.634
			0.9084
			0.7066
			0.7394
			0.5887
			0.5328
			0.6994
			0.8156
			0.5255
			0.8789
			0.8398
			0.7279
			0.8679
			0.501
			0.792
			0.6923
			0.6297
			0.8912
			0.9329
			0.9897
			0.7652
			0.4795
			0.6583
			1.0253
			0.8439
			0.7379
			0.9591
			0.6353
			1.1268
			0.9047
			0.9913
			0.7233
			0.6664
			0.6962
			0.6514
			0.8585
			0.852
			0.7486
			0.8096
			0.6721
			0.8755
			0.7534
			0.8955
			0.719
			0.817
			0.5816
			0.9162
			0.9326
			1.0264
			0.7304
			0.7202
			0.9643
			0.6232
			0.9107
			0.4971
			0.6334
			0.8015
			0.5235
			0.7641
			0.7078
			0.4863
			0.8343
			0.6817
			0.5957
			0.6287
			0.7096
			0.9072
			0.6966
			0.861
			0.6355
			0.5679
			0.8598
			0.8658
			0.5864
			0.858
			0.6413
			0.7652
			0.7531
			0.841
			0.6445
			0.8836
			0.6732
			0.9301
			0.5969
			0.9846
			1.0177
			0.5677
			0.6698
			0.6245
			0.7148
			0.9008
			0.7204
			0.6033
			0.6507
			0.6405
			0.8233
			0.7094
			0.7627
			0.6752
			0.4558
			0.6528
			0.9223
			0.8067
			0.8807
			0.7208
			0.8386
			0.5798
			0.7008
			0.9236
			0.6715
			0.723
			0.6936
			0.4907
			0.789
			0.8156
			1.0953
			0.5184
			0.5754
			0.9901
			0.6058
			0.5926
			0.8925
			0.8161
			0.6285
			0.5531
			0.7641
			0.4408
			0.6576
			0.4752
			0.6837
			0.4944
			0.5977
			0.3501
			0.3857
			0.5889
			0.4826
			0.5465
			0.4929
			0.6102
			0.5819
			0.4219
			0.5129
			0.9162
			0.6447
			0.4782
			0.5607
			0.5774
			0.5679
			0.5201
			0.5771
			0.4248
			0.5201
			0.5771
			0.4248
			0.56
			0.7343
			0.9163
			0.7532
			0.7562
			0.5784
			0.7071
			0.8657
			0.7584
			0.62
			0.6401
			0.359
			0.4886
			0.4748
