# Supplementary material for: Local axonal morphology guides the topography of interneuron myelination in mouse and human neocortex
Source: eLife. 2019 Nov 19;8:e48615. doi: 10.7554/eLife.48615 (PMC6927753; doi:10.7554/eLife.48615)
Supplement: Figure 2—source data 1. [file elife-48615-fig2-data1.xlsx]

## Sheet: 2d
	2d
			Distance from internode to branch point
		(µm)	1.16
			4.83
			12.01
			0.67
			3.95
			1.89
			4.05
			0.61
			2.45
			1.78
			1.02
			1
			1.56
			7.23
			2.22
			8.33
			33.14
			1.65
			2
			1.28
			1.4
			1.61
			3.33
			1.17
			3.55
			1.02
			1.48
			0.67
			0.67
			2.07
			5.66
			1.31
			1.58
			1.69
			48.7

## Sheet: 2e
	2e
			Branch Order
			1	2	3	4	5	6	7
		Diameter	0.793	0.638	0.512	0.516	0.379	0.477	0.39
		(µm)	0.711	0.495	0.371	0.421	0.395	0.361	0.397
			0.481	0.492	0.336	0.529	0.474		0.393
			0.513	0.566		0.472	0.542		0.399
				0.551		0.421	0.285
						0.416	0.391
						0.412	0.437
						0.392	0.392
						0.452	0.393
						0.586	0.347
						0.371

## Sheet: 2f
	2f
			PV Branching Distance x Diameter
			Interbranch distance (µm)	Axonal diameter (µm)	Outcome
			13.767	0.452219	2	***Outcome [1 = umyelinated segment, 2 = myelinated segment]
			17.716	0.585553	2
			18.486	0.39669	2
			18.803	0.49497	2
			19.2663	0.473673	2
			20.414	0.480851	2
			20.883	0.542348	2
			21.032	0.49175	2
			21.202	0.513154	2
			21.93	0.565827	2
			23.085	0.550949	2
			23.207	0.378921	2
			24.319	0.412281	2
			28.5	0.638283	2
			28.58	0.336075	2
			28.87	0.421185	2
			29.08	0.528772	2
			29.396	0.392214	2
			31.976	0.394667	2
			32.576	0.420868	2
			33.526	0.415922	2
			33.544	0.399255	2
			33.8314	0.392916	2
			39.0701	0.390214	2
			40.126	0.436554	2
			41.404	0.390866	2
			41.729	0.471873	2
			42.64	0.370803	2
			44.382	0.360939	2
			45.001	0.512341	2
			45.241	0.476889	2
			46.282	0.393078	2
			57.178	0.391523	2
			58.316	0.284775	2
			73.874	0.371326	2
			83.353	0.346948	2
			3.115	0.36899	1
			3.392	0.7659	1
			3.7142	0.281476	1
			3.755	0.287858	1
			3.9857	0.200095	1
			4.116	0.227543	1
			4.383	0.317108	1
			4.536	0.239958	1
			4.92	0.350634	1
			5.195	0.295403	1
			5.457	0.286901	1
			6.195	0.245839	1
			6.465	0.290116	1
			6.506	0.305075	1
			6.532	0.339739	1
			6.8	0.302734	1
			7	0.439876	1
			7.004	0.227604	1
			7.657	0.264196	1
			7.854	0.464409	1
			8.23	0.282806	1
			8.707	0.297018	1
			9.152	0.213425	1
			9.693	0.272884	1
			9.74	0.249648	1
			9.953	0.253233	1
			10.057	0.204314	1
			10.1686	0.577178	1
			10.178	0.211654	1
			10.328	0.349956	1
			10.75	0.291605	1
			10.787	0.309989	1
			11.18	0.248432	1
			11.505	0.316709	1
			11.893	0.193338	1
			12.027	0.163969	1
			12.212	0.276163	1
			12.217	0.270678	1
			12.331	0.318592	1
			12.594	0.473299	1
			12.711	0.350129	1
			12.784	0.263095	1
			13.082	0.260042	1
			13.09	0.305339	1
			13.446	0.362351	1
			13.5571	0.233509	1
			13.609	0.412779	1
			13.669	0.263802	1
			13.711	0.312611	1
			13.758	0.240293	1
			13.859	0.290444	1
			14.081	0.290411	1
			14.2318	0.164993	1
			14.267	0.19417	1
			14.935	0.297612	1
			15.438	0.277786	1
			16.682	0.328261	1
			17.051	0.248087	1
			17.956	0.267339	1
			17.968	0.271345	1
			19.271	0.28141	1
			19.44	0.399711	1
			19.744	0.236967	1
			20.548	0.263095	1
			20.826	0.507913	1
			21.65	0.310215	1
			21.9	0.331227	1
			22.231	0.235151	1
			22.91	0.217271	1
			24.67	0.198734	1
			25.265	0.309826	1
			27.678	0.230731	1
			27.744	0.284773	1
			27.952	0.271652	1
			28.719	0.361027	1
			29.82	0.215193	1
			30.347	0.182382	1
			32.167	0.213728	1
			32.739	0.209315	1
			34.935	0.2166	1
			35.714	0.27577	1
			36.1	0.175449	1
			37.022	0.295482	1
			40.459	0.291597	1
			41.5948	0.258283	1
			46.754	0.225263	1
			48.947	0.178175	1
			48.968	0.265869	1
			49.814	0.30387	1
			50.384	0.277734	1
			53.555	0.239753	1
			55.961	0.211182	1
			58.246	0.220707	1
			65.5279	0.292	1
			76.402	0.306413	1
			86.252	0.255929	1
