# Supplementary material for: Local axonal morphology guides the topography of interneuron myelination in mouse and human neocortex
Source: eLife. 2019 Nov 19;8:e48615. doi: 10.7554/eLife.48615 (PMC6927753; doi:10.7554/eLife.48615)
Supplement: Figure 3—source data 1. [file elife-48615-fig3-data1.xlsx]

## Sheet: 3g
	3g
			Axonal Segments
			Unmyelinated	Myelinated
		Diameter	0.33	0.758
		(µm)	0.15	0.342
			0.187	0.405
			0.186	0.649
			0.396	0.366
			0.282	0.37
			0.456	0.814
			0.168	0.942
			0.317	0.573
			0.218	0.663
			0.269	0.528
			0.278	0.544
			0.587	0.499
			0.54	0.474
			0.203	0.617
			0.31
			0.152
			0.339
			0.197
			0.527
			0.221
			0.189
			0.218
			0.176
			0.148
			0.067
			0.283
			0.257
			0.293
			0.174
			0.312
			0.189
			0.379
			0.216
			0.228
			0.349
			0.183
			0.255
