# Supplementary material for: Local axonal morphology guides the topography of interneuron myelination in mouse and human neocortex
Source: eLife. 2019 Nov 19;8:e48615. doi: 10.7554/eLife.48615 (PMC6927753; doi:10.7554/eLife.48615)
Supplement: Figure 4—source data 1. [file elife-48615-fig4-data1.xlsx]

## Sheet: 4c
	4c
			PV Mutants Cell Size
			PV::UBE3A	PV::WT	PV::TSC1
		Soma Area	86.473	71.23	126.436
		(µm2)	83.639	99.077	124.482
			87.352	86.766	102.986
			86.082	86.961	111.291
			84.128	120.866	167.669
			86.864	126.534	120.182
			94.778	60.775	162.491
			90.87	106.503	131.614
			128.976	106.015	84.128
			82.271	103.279	170.894
			88.134	80.512	123.798
			85.105	97.025	143.242
			59.798	193.855	212.42
			76.604	130.442	155.553
			83.932	103.963	134.155
			70.644	56.769	132.689
			76.311	87.45	100.054
			135.034	83.248	192.78
			72.305	110.802	194.637
			134.741	124.97	198.545
			71.328	89.893	124.482
			78.754	128.488	99.273
			85.984	106.112	164.445
			93.117	110.314	163.663
			86.766	71.425	99.566
			85.496	91.651	107.773
			88.109	92.14	97.905
			81.392	105.037	122.625
			68.714	99.663	280.23
			54.644	93.312	123.993
			71.499	109.728	104.647
			81.709	154.576	252.774
			93.019	106.308	119.205
			83.175	85.886	102.302
			81.148	94.583	68.69
			129.465	112.659	164.64
			111.56	67.81	123.114
			49.465	99.468	186.918
			87.865	91.163	228.151
			120.134	89.404	186.136
			114.271	118.717	49.343
			100.958	95.951	187.309
			101.056	82.955	116.86
			111.682	96.341	88.329
			121.306	118.619	259.516
			111.682	115.59	194.93
			136.451	93.019	271.73
			83.175	98.882	162.784
			102.57	95.755	58.528
			89.086	148.201	134.937
			91.163	101.056	152.817
			96.439	75.016	211.834
			69.203	135.474	201.574
			69.032	110.338	250.917
			133.715	77.581	116.665
			116.738	112.732	181.251
			102.179	134.008	164.933
			95.144	91.993	133.959
				99.492	115.004
				152.842	153.99
				81.465	136.011
				135.23	111.779
				91.798	200.499
				80.659	141.092
				113.953	110.802
				168.109	129.074
				99.175	125.85
				75.603	234.307
				89.575	195.419
				129.66	138.943
				100.689	106.503
				129.05	164.64
				102.717	182.032
				115.981	127.022
				91.651	123.798
				77.435	139.431
				172.188	211.345
				150.497	274.27
				151.034	173.043
				160.219	203.724
				101.96	243.296
				121.086	203.919
				83.908	133.569
				100.714	112.463
				119.572	159.755
				92.653	112.952
				96.83	126.729
				113.05	214.667
				65.27	143.828
				55.768	168.842
				136.915	185.355
				101.667	286.386
				89.526	231.571
				74.43	105.428
				124.579	154.869
				55.841	198.838
				115.712	134.35
				83.883	174.411
				66.882	138.356
				114.857	160.927
				83.664	167.376
				92.164	174.411
				99.566	200.206
				106.503	166.204
				94.9	124.97
				113.709	153.404
				166.79	194.93
				105.721	140.701
				111.804	175.388
					166.79
					122.625
					212.518
					241.928
					204.017
					150.961
					131.614
					126.924
					145.978
					258.734
					96.244
					107.676
					271.632
					174.802
					232.45
					183.4
					130.735
					140.213
					176.854
					134.057
					138.552
					116.763
					143.535
					169.916
					180.078
					121.648
					147.052
					145.88
					172.848
					182.228
					167.962
					137.868
					133.373
					144.512
					205.092
					158.484
					138.454
					296.548
					203.333
					144.805
					148.714
					135.034
					137.575
					216.133
					243.492
					201.183
					170.6
					152.915
					123.7
					154.869

## Sheet: 4f
	4f
			PV Mutants Axon Size
			PV::UBE3A	PV::WT	PV::TSC1
		Onset Diameter	0.6874	0.7309	0.9312
		(µm)	0.5351	0.7368	0.9286
			0.6969	0.7286	0.7541
			0.7549	0.6409	0.8527
			0.725	0.4236	0.7976
			0.6248	0.7318	0.9471
			0.6317	0.697	1.1396
			0.5512	0.3996	0.8221
			0.4696	0.4588	0.8185
			0.4144	0.5926	1.0964
			1.0978	0.7599	0.7188
			0.7939	0.7259	1.0763
			0.5508	0.8292	1.0188
			0.6729	0.6586	0.9325
			0.5704	0.7338	0.6969
			0.5941	0.7114	0.5014
			0.4873	0.7389	0.7332
			0.5635	0.7161	0.7623
			0.6553	0.8153	0.9982
			0.3999	0.5045	0.6915
			0.491	0.5692	1.4106
			0.5651	0.5684	0.6456
			0.4678	0.9109	0.7823
			0.557	0.5805	0.9131
			0.5355	0.6007	0.8018
			0.6593	0.5741	0.5296
			0.6331	0.4628	0.7369
			0.5404	0.7442	0.8329
			0.5775	0.4218	0.7181
			0.6559	0.6887	0.7751
			0.7859	0.8987
			0.4189	0.7202
			0.4864	0.5027
			0.8642	0.8355
			0.6041	0.5911
			0.7345	0.6222
				0.64
				0.8485
				0.5932
				0.6775
				0.6624
				0.7597
				0.7879
				0.5146
				0.8144
				0.6538
