# Supplementary material for: Local axonal morphology guides the topography of interneuron myelination in mouse and human neocortex
Source: eLife. 2019 Nov 19;8:e48615. doi: 10.7554/eLife.48615 (PMC6927753; doi:10.7554/eLife.48615)
Supplement: Figure 5—source data 1. [file elife-48615-fig5-data1.xlsx]

## Sheet: 5j
	5j
			Total Myelination
			PV::UBE3A	PV::WT	PV::TSC1
		Myelination	75.4	207.8	273.9
		(µm)	14.2	297.6	190.6
			18.4	153.4	152.9
			175.4	326.2	128.7
			0	255.6	1236.9
			37	60.7	639.4
			237.64	43.8	768
			45.72	0	205.4
				241.86	477.8
				229.12	251.1
				258.97	314.7
					280.5
					1155.61

## Sheet: 5k
	5k
			Average Internode Length
			PV::UBE3A	PV::WT	PV::TSC1
		Internode Length	21.63	21.76	33.6
		(µm)	14.3	22.07	35.06
			18.4	26.75	19.92
			17.3	25.21	29.13
			18.5	22.87	31.47
			21.97	31.17	47.45
			15.24	21.9	36.94
				22.69	22.26
				26.27	29.87
				27.8	26.02
					34.67
					23.16
					38.15

## Sheet: 5l
	5l
			Average Internode Number
			PV::UBE3A	PV::WT	PV::TSC1
		Internode Number	3.49	9.55	8.15
		(#)	1	13.4	5.4
			1	5.7	7.7
			8	12.9	4.4
			0	11.2	39.3
			2	1.96	13.4
			10.8	2	20.8
			3	0	9.2
				10.66	15.99
				8.72	9.65
				9.32	9.08
					12.1
					30.29

## Sheet: 5m
	5m
				Branch Order
				1	2	3	4	5	6	7
		PV::UBE3A	Cell 1	69.5	21.21	19.02	17.22	15.07	22.48	26.21	Branching Distance
			Cell 2	91.64	11.03	12.35	20.53	14.25	31.51	28.32	(µm)
			Cell 3	47.57	11.81	23.58	22.29	39.71	28.48	10.23
			Cell 4	57.16	25.82	16.44	23.82	18.1	21.39	27.95
		PV::WT	Cell 1	49.74	31.75	9.3	13.48	34.02	46.44	27.68
			Cell 2	44.28	16.59	15.74	58.12	23.34	34.44	25
			Cell 3	45.3	17.25	10.58	18.77	19.81	30.01	35.67
			Cell 4	45	10.27	25.93	23.16	22.16	14.74	23.94
			Cell 5	40.58	17.92	29.53	8.45	19.77	24.7	16.49
		PV::TSC1	Cell 1	53.22	8.55	25.64	17.49	27.46	28.18	14.6
			Cell 2	49.02	14.37	42.43	34.72	42.69	23.66	29.43
			Cell 3	58.1	12.86	9.41	34.2	24.05	24.41	27.96
			Cell 4	73.85	8.1	7.51	20.04	16.88	33.18	23.45
			Cell 5	41.42	40.4	5.99	24.59	11.29	23.6	38.92
			Cell 6	88.22	6.11	20.01	27.85	28.06	52.51	37.67

## Sheet: 5n
	5n
			Myelin Onset
			PV::UBE3A	PV::WT	PV::TSC1
		Onset	31.7	93.5	24.8
		(µm)	20.2	34.2	71.7
			45.4	19.64	27
			37.1	39.5	47.7
			23.27	25.7	36.8
			24.25	60.7	27.4
				48.2	29.8
				18.2	42.57
				75.86	24.23
					26.96
					41.89

## Sheet: 5p
	5p
			PV::UBE3A Branching Distance x Diameter
			Interbranch distance (µm)	Axonal diameter (µm)	Outcome
			14.371	0.331837	2	***Outcome [1 = umyelinated segment, 2 = myelinated segment]
			21.941	0.417618	2
			23.791	0.421086	2
			28.078	0.404083	2
			32.102	0.36974	2
			32.5626	0.344037	2
			35.299	0.372873	2
			39.869	0.552718	2
			40.154	0.414837	2
			3.316	0.15942	1
			3.694	0.146498	1
			3.812	0.594976	1
			3.993	0.182005	1
			4.3165	0.331659	1
			5.097	0.291832	1
			5.83	0.277807	1
			6.122	0.279814	1
			6.241	0.272679	1
			6.297	0.307321	1
			8.02	0.199732	1
			8.434	0.298754	1
			9.198	0.303022	1
			9.476	0.256193	1
			9.49	0.260211	1
			9.91	0.297299	1
			10.09	0.295998	1
			11.06	0.165615	1
			11.225	0.293129	1
			11.941	0.258109	1
			11.9577	0.166656	1
			11.988	0.194465	1
			12.119	0.296446	1
			12.4935	0.221168	1
			13.891	0.306965	1
			14.553	0.18371	1
			18.287	0.174525	1
			18.849	0.374196	1
			19.714	0.308751	1
			20.903	0.288361	1
			20.917	0.165925	1
			24.3422	0.285606	1
			27.15	0.254105	1
			27.69	0.242464	1
			30.102	0.308751	1
			31.138	0.182448	1
			31.961	0.287367	1
			39.656	0.288059	1
			58.509	0.230074	1
			68.28	0.262493	1

## Sheet: 5q
	5q
			PV::TSC1 Branching Distance x Diameter
			Interbranch distance (µm)	Axonal diameter (µm)	Outcome
			18.91	0.672983	2	***Outcome [1 = umyelinated segment, 2 = myelinated segment]
			19.243	0.568384	2
			20.489	0.690512	2
			20.7109	0.777198	2
			23.972	0.423272	2
			24.502	0.492317	2
			24.564	0.663891	2
			25.142	0.578393	2
			25.49	0.582474	2
			27.03	0.90069	2
			30.259	0.941343	2
			31.101	0.730698	2
			32.299	0.860646	2
			35.572	0.517009	2
			36.669	0.613481	2
			41.799	0.513509	2
			42.991	0.55248	2
			43.678	0.478	2
			45.729	0.45965	2
			51.223	0.402315	2
			52.971	0.381881	2
			2.018	0.425813	1
			3.536	0.560144	1
			4.318	0.331651	1
			4.379	0.385322	1
			4.398	0.487087	1
			4.782	0.413681	1
			4.909	0.345183	1
			5.411	0.374613	1
			5.434	0.930618	1
			5.573	0.436812	1
			6.793	0.278908	1
			7.194	0.54735	1
			7.564	0.476478	1
			7.614	0.295444	1
			9.168	0.411072	1
			9.229	0.526044	1
			9.314	0.344078	1
			9.93	0.306522	1
			10.321	0.410507	1
			11.938	0.258	1
			11.946	0.389738	1
			12.404	0.723658	1
			12.872	0.365	1
			15.443	0.338367	1
			17.293	0.402833	1
			17.855	0.342724	1
			18.006	0.409255	1
			18.299	0.357	1
			22.072	0.30333	1
			22.314	0.308092	1
			25.881	0.274144	1
			33.411	0.369982	1
			41.145	0.257491	1
			42.569	0.328627	1
			50.048	0.474315	1
			55.416	0.476846	1
			60.61	0.308292	1
