# Supplementary material for: Local axonal morphology guides the topography of interneuron myelination in mouse and human neocortex
Source: eLife. 2019 Nov 19;8:e48615. doi: 10.7554/eLife.48615 (PMC6927753; doi:10.7554/eLife.48615)
Supplement: Figure 6—source data 1. [file elife-48615-fig6-data1.xlsx]

## Sheet: 6f
	6f
			Axonal Segments
		Diameter	0.828
		(µm)	0.403
			0.5
			0.542
			0.527
			0.547
			0.449
			0.561
			0.453
			0.317
			0.35
			0.434
			0.323
			0.475
			0.23
			0.189
			0.366
			0.431
			0.287
			0.287
			0.346
			0.286
			0.308
			0.338
			0.283
			0.365
			0.234
			0.306
			0.316
			0.33
			0.368
			0.34
			0.278
			0.257
			0.421
			0.265
			0.405
			0.368
			0.281
			0.265
			0.31
			0.264
			0.318
			0.25
			0.271
			0.182
			0.315
			0.27
			0.232
			0.309
			0.274
			0.27
			0.377
			0.335
			0.285
			0.259
			0.257
			0.232
			0.294
			0.32
			0.232
			0.245
			0.316
			0.242
			0.246
			0.261
			0.328
			0.247
			0.217
			0.303
			0.287
			0.296
			0.314
			0.227
			0.287
			0.417
			0.227
			0.243
			0.26
			0.274
			0.345
			0.262
			0.351
			0.258
			0.233
			0.258
			0.314
			0.265
			0.235
			0.297
			0.241
			0.448
			0.215
			0.209
			0.28
			0.246662

## Sheet: 6g
	6g
			Branch Order
			1	2	3	4	5	6	7
		Diameter	0.828	0.453	0.346	0.368	0.259	0.227	0.265
		(µm)	0.403	0.317	0.286	0.281	0.257	0.287	0.235
			0.5	0.35	0.308	0.265	0.232	0.417	0.297
			0.542	0.434	0.338	0.31	0.294	0.227	0.241
			0.527	0.323	0.283	0.264	0.32	0.243	0.448
			0.547	0.475	0.365	0.318	0.232	0.26	0.215
			0.449	0.23	0.234	0.25	0.245	0.274	0.209
			0.561	0.189	0.306	0.271	0.316	0.345	0.28
				0.366	0.316	0.182	0.242	0.262	0.246662
				0.431	0.33	0.315	0.246	0.351
				0.287	0.368	0.27	0.261	0.258
				0.287	0.34	0.232	0.328	0.233
					0.278	0.309	0.247	0.258
					0.257	0.274	0.217	0.314
					0.421	0.27	0.303
					0.265	0.377	0.287
					0.405	0.335	0.296
						0.285	0.314

## Sheet: 6h
	6h
			SOM Branching Distance x Diameter
			Interbranch distance (µm)	Axonal diameter (µm)	Outcome
			18.1	0.561	2	***Outcome [1 = umyelinated segment, 2 = myelinated segment]
			34.54	0.431	1
			10.169	0.577	1
			3.755	0.288	1
			21.65	0.31	1
			14.232	0.165	1
			36.1	0.175	1
			48.947	0.178	1
			7	0.44	1
			10.057	0.204	1
			12.027	0.164	1
			24.67	0.199	1
			46.754	0.225	1
			3.392	0.766	1
			12.711	0.35	1
			4.92	0.351	1
			21.9	0.331	1
			15.438	0.278	1
			58.246	0.221	1
			12.212	0.276	1
			12.331	0.319	1
			14.081	0.29	1
			22.231	0.235	1
			50.384	0.278	1
			5	0.98	1
			11.505	0.317	1
			12.594	0.473	1
			49.814	0.304	1
			35.714	0.276	1
			7.854	0.464	1
			10.75	0.292	1
			44.213	0.26	1
			13.082	0.413	1
			13.609	0.287	1
			5.457	0.246	1
			6.195	0.295	1
			5.195	0.313	1
			13.711	0.217	1
			22.91	0.522	1
			22.156	0.362	1
			13.446	0.317	1
			4.383	0.283	1
			8.23	0.34	1
			6.532	0.264	1
			13.669	0.272	1
			27.952	0.29	1
			13.859	0.35	1
			10.328	0.215	1
			29.82	0.248	1
			17.051	0.194	1
			14.267	0.211	1
			55.961	0.4	1
			19.44	0.228	1
			7.004	0.267	1
			17.956	0.29	1
			6.465	0.253	1
			9.953	0.298	1
			14.935	0.228	1
			4.116	0.24	1
			13.758	0.214	1
			32.167	0.328	1
			16.682	0.31	1
			25.265	0.209	1
			32.739	0.303	1
			6.8	0.182	1
			30.347	0.366	1
			40.606	0.271	1
			17.968	0.281	1
			19.271	0.292	1
			40.459	0.25	1
			9.74	0.248	1
			11.18	0.263	1
			12.784	0.263	1
			20.548	0.231	1
			27.678	0.237	1
			19.744	0.264	1
			7.657	0.755	1
			3.115	0.273	1
			9.693	0.213	1
			9.152	0.305	1
			13.09	0.2	1
			3.9857	0.281	1
			3.7142	0.234	1
			13.5571	0.212	1
			10.178	0.193	1
			11.893	0.24	1
			4.536	0.285	1
			27.744	0.266	1
			48.968	0.31	1
			10.787	0.24	1
			53.555	0.292	1
			65.5279	0.258283	1
