# Supplementary material for: Local axonal morphology guides the topography of interneuron myelination in mouse and human neocortex
Source: eLife. 2019 Nov 19;8:e48615. doi: 10.7554/eLife.48615 (PMC6927753; doi:10.7554/eLife.48615)
Supplement: Figure 7—source data 1. [file elife-48615-fig7-data1.xlsx]

## Sheet: 7b
	7b
			SOM Mutants Cell Size
			SOM::WT	SOM::TSC1
		Soma Area	108.026	153.962
		(µm2)	117.953	126.322
			102.284	156.589
			62.285	190.554
			90.508	154.254
			124.473	130.021
			83.112	110.07
			113.281	183.742
			116.688	136.444
			105.982	179.752
			98.878	117.758
			103.257	129.437
			128.366	164.764
			126.322	149.971
			109.194	126.906
			104.523	134.205
			73.769	143.743
			89.243	156.979
			99.17	144.424
			92.941	125.349
			101.311	155.713
			105.885	159.801
			88.075	125.933
			82.139	165.737
			79.706	144.716
			101.214	139.169
			72.601	236.003
			102.868	124.863
			85.642	154.254
			93.525	154.156
			123.111	101.506
			91.092	123.597
			103.16	124.668
			104.815	138.196
			105.982	108.318
			113.963	140.142
			119.997	270.941
			122.43	154.643
			103.16	211.478
			118.342	158.146
			119.705	111.432
			114.449	124.863
			96.932	175.372
			118.634	200.87
			86.421	116.396
			131.188	126.809
			110.362	140.434
			98.975	158.633
			85.253	118.05
			99.559	203.011
			121.359	171.577
			98.781	175.761
			111.822	139.753
			107.734	200.286
			62.48	150.166
			76.592	157.173
			84.961	199.41
			70.168	232.11
			136.541	131.967
			80.971	209.337
			98.781	194.739
			109.389	234.738
			113.963	170.798
			80.971	211.089
			105.69	182.087
			116.006	206.32
			127.101	278.046
			90.898	193.474
			96.056	178.389
			128.853	222.378
			119.705	152.696
			113.379	188.121
			96.348	141.407
			72.601	140.531
			89.924	183.061
			98.294	173.134
			86.713	177.611
			116.688	165.835
			125.544	163.791
			109.097	201.26
			68.027	168.852
				156.395
				198.924
				177.027
				224.908
				168.949
				106.566
				231.429
				248.46
				168.365
				186.369
				181.601
				116.493
				192.987
				170.506
				100.435
				153.475
				173.036
				222.767
				254.007
				191.43
				177.124
				161.358

## Sheet: 7d
	7d
			SOM Mutants Axon Size
			SOM::WT	SOM::TSC1
		Onset Diameter	0.7176	1.3915
		(µm)	0.5723	1.8304
			0.6133	1.668
			0.8271	1.5463
			0.6155	1.537
			0.7297	1.2528
			0.6772	1.2985
			0.8828	1.2802
			0.7038	1.8585
			1.1046	1.5893
			0.5974	0.97
			0.6568	1.5856
			1.2022	1.289
			0.9418	0.9113
			1.2153	1.8669
			0.6562	1.062
			0.6997	0.975
			0.9838

## Sheet: 7i
	7i
			Total Myelination
			SOM::WT	SOM::TSC1
		Myelination	0	77.72
		(µm)	0	139.95
			0	172.64
			0	121.09
			0	212.48
			0	344.83
				120.58
				138.09
				355.11
				401.67
				206.9

## Sheet: 7j
	7j
			Average Internode Number
			SOM::WT	SOM::TSC1
		Internodes	0	4
		(#)	0	4
			0	6
			0	5
			0	8
			0	11
				5
				5
				7
				13.3
				8.4

## Sheet: 7k
	7k
			Average Internode Length
			SOM::WT	SOM::TSC1
		Internode Length	0	19.43
		(µm)	0	34.99
			0	28.77
			0	26.98
			0	33.38
			0	30.31
				24.73
				27.62
				30.58
				30.09
				24.71

## Sheet: 7n
	7n
			Myelin Onset
			SOM::WT	SOM::TSC1
		Onset	0	24.8
		(µm)	0	106.6
			0	65.9
			0	58.1
			0	54.17
			0	33.9
				47.49
				69.35
				58.84
				22.57
				72.15

## Sheet: 7p
	7p
			SOM::TSC1 Branching Distance x Diameter
			Interbranch distance (µm)	Axonal diameter (µm)	Outcome
			6.641	0.586	2	***Outcome [1 = umyelinated segment, 2 = myelinated segment]
			12.439	0.735	2
			16.009	0.552	2
			18.656	0.413	2
			20.593	0.644	2
			20.766	0.483	2
			24.3	0.482	2
			27.403	0.469	2
			27.988	0.608	2
			28.547	0.513	2
			28.758	0.414	2
			29.766	0.736	2
			33.906	0.432	2
			35.774	0.538	2
			37.518	0.559	2
			40.704	0.482	2
			47.696	0.736	2
			48.924	0.555	2
			52.873	0.475	2
			55.38	0.438	2
			1.344	1.056	1
			1.421	0.416	1
			2.9	0.728	1
			2.973	0.486	1
			3.408	0.287	1
			3.633	0.509	1
			4.115	0.592	1
			4.378	0.255	1
			6.439	0.471	1
			6.672	0.31	1
			6.855	0.308	1
			6.865	0.487	1
			6.895	0.552	1
			6.982	0.378	1
			7.007	0.638	1
			7.083	0.641	1
			7.231	0.295	1
			7.413	0.621	1
			7.849	0.361	1
			7.992	0.315	1
			8.176	0.475	1
			8.958	0.326	1
			9.391	0.488	1
			9.52	0.432	1
			9.596	0.378	1
			9.597	0.568	1
			10.106	0.502	1
			10.188	0.345	1
			10.286	0.567	1
			11.127	0.48	1
			13.061	0.25	1
			13.2	0.347	1
			13.689	0.51	1
			14.095	0.357	1
			14.267	0.283	1
			15.568	0.32	1
			15.73	0.397	1
			19.159	0.292	1
			20.605	0.292	1
			22.404	0.304	1
			22.475	0.335	1
			23.155	0.322	1
			23.35	0.623	1
			25.856	0.251	1
			26.102	0.318	1
			26.257	0.399	1
			27.042	0.298	1
			28.306	0.261	1
			29.833	0.324	1
			31.423	0.355	1
			33.065	0.308	1
			34.473	0.397	1
			34.601	0.306	1
			35.827	0.667	1
			37.369	0.282	1
			38.06	0.837	1
			38.126	0.752	1
			38.466	0.323	1
			42.898	0.296	1
			43.755	0.308	1
			46.396	0.292	1
			47.243	0.888	1
			48.691	0.92	1
			51.044	0.288	1
			52.972	0.284	1
			54.07	0.315	1
			60.591	0.308	1
			66.139	0.302	1
			68.515	0.286	1
			75.001	0.283	1
			80	0.273	1
