# Supplementary material for: Local axonal morphology guides the topography of interneuron myelination in mouse and human neocortex
Source: eLife. 2019 Nov 19;8:e48615. doi: 10.7554/eLife.48615 (PMC6927753; doi:10.7554/eLife.48615)
Supplement: Figure 8—source data 1. [file elife-48615-fig8-data1.xlsx]

## Sheet: 8e
	8e
			MBP Fluorescent Area
			SOM::WT	SOM::TSC1
		Area	14852.1	36318.1
		(µm2)	3925.83	79445
			11461.3	68686.6
			4095.55	54826
			6463.56	36265.2
			15479.1	35927.8
			27296.8	69960.4
			12884.1	56758.9
			34286.6	56758.9
			45301.3	86488.9
			16359.7	51790.5
			23582.6	51790.5

## Sheet: 8g
	8g
			CC1+ Cell Numbers
			SOM::WT	SOM::TSC1
		Numbers	2.4359	3.23077
		(per 104 µm2)	2.79487	3.19231
			2.60256	3.41026
			2.62821	3.05128
			2.44872	2.80769
			2.24359	3.21795
			2.62821	3.25641
			2.48718	2.80769
			2.46154	3.20513
			2.69231	3.15385
			2.37179	3.0641
			2.88462	2.60256
