# Supplementary material for: Local axonal morphology guides the topography of interneuron myelination in mouse and human neocortex
Source: eLife. 2019 Nov 19;8:e48615. doi: 10.7554/eLife.48615 (PMC6927753; doi:10.7554/eLife.48615)
Supplement: Figure 9—source data 1. [file elife-48615-fig9-data1.xlsx]

## Sheet: 9h
	9h
			Distance from internode to branch point
		(µm)	18.65
			4.82
			15.15
			12.83
			1.26
			26.44
			0.89
			1.93
			4.07
			8.99
			4.71
			3.02
			2.28
			3.33
			4.21
			2.89
			1.9
			2.23
			23.88
			0.83
			1.42
			14.93
			6.55
			0.89
			2.28
			2.58
			2.25
			6.77
			3.25
			3.18
			1.99
			2.46
			2.53
			1.89
			2.63
			19.8
			4.11
			3.42
			1.14
			1.87
			1.32
			1.66
			1.13
			2.79
			2.12
			1.58
			2.02
			2.62
			11.26
			2.79
			2.22
			2.38
			2.73
			23.11
			1.66

## Sheet: 9j
	9j
			Human FS interneurons
			Interbranch distance (µm)	Axonal diameter (µm)	Outcome
			13.9853	0.451832	2	***Outcome [1 = umyelinated segment, 2 = myelinated segment]
			15.1186	0.640798	2
			15.5052	0.547737	2
			16.3192	0.33587	2
			16.561	0.435649	2
			17.7351	0.435649	2
			19.4396	0.429591	2
			20.3316	0.465573	2
			21.0349	0.388409	2
			21.3885	0.297236	2
			21.5224	0.461894	2
			22.7016	0.508415	2
			23.4189	0.331373	2
			23.6064	0.396824	2
			25.1905	0.372701	2
			28.8688	0.738258	2
			33.2447	0.396535	2
			33.6965	0.548972	2
			35.5538	0.624067	2
			37.1502	0.465623	2
			37.1964	0.334745	2
			40.2139	0.362489	2
			43.0387	0.47509	2
			43.8274	0.3917	2
			43.9774	0.480541	2
			44.9292	0.385936	2
			45.172	0.629734	2
			45.5853	0.629734	2
			47.9899	0.368584	2
			50.2621	0.569123	2
			50.7597	0.47359	2
			53.0054	0.391764	2
			65.0631	0.266694	2
			67.7057	0.394801	2
			71.0307	0.542052	2
			77.0446	0.63518	2
			80.195	0.260247	2
			97.7942	0.353074	2
			138.391	0.344698	2
			177.527	0.651218	2
			3.853	0.35	1
			4.5809	0.312968	1
			4.6417	0.282595	1
			4.8843	0.214582	1
			5.0691	0.214582	1
			5.6796	0.414155	1
			6.27	0.261	1
			6.8372	0.379277	1
			7.2328	0.282236	1
			7.299	0.321128	1
			8.0774	0.386406	1
			8.0774	0.386406	1
			8.087	0.377	1
			8.45	0.205	1
			10.1006	0.252	1
			10.1682	0.424419	1
			10.291	0.30507	1
			10.819	0.261	1
			10.948	0.223445	1
			12.1149	0.270661	1
			12.485	0.259371	1
			13.307	0.216156	1
			13.382	0.37539	1
			14.062	0.284014	1
			14.987	0.208998	1
			16.114	0.29466	1
			16.2877	0.375264	1
			17.8986	0.324702	1
			18.1644	0.257145	1
			20.028	0.269	1
			20.8789	0.351474	1
			21.6315	0.253998	1
			23.1418	0.497564	1
			24.7446	0.195986	1
			24.9879	0.247121	1
			25.018	0.281661	1
			29.5857	0.211806	1
			30.4639	0.290705	1
			30.515	0.264912	1
			33.9836	0.35344	1
			36.6392	0.249129	1
			37.6995	0.265898	1
			39.8493	0.249417	1
			49.3674	0.25739	1
			49.5514	0.285754	1
			54	0.212768	1
			54.2616	0.220846	1
			56.2904	0.182982	1
			59.8772	0.297188	1
			61.5696	0.361056	1
			68.0969	0.309897	1
			71.6153	0.192889	1
			77.5216	0.249365	1
			81.4831	0.206215	1
			195.852	0.212034	1
			217.19	0.405099	1
