# Supplementary figures and images for: Local axonal morphology guides the topography of interneuron myelination in mouse and human neocortex
Source: eLife journal article supplement (doi:10.7554/elife.48615), 2019-11-19

Figure 1 - Figure Supplement 1

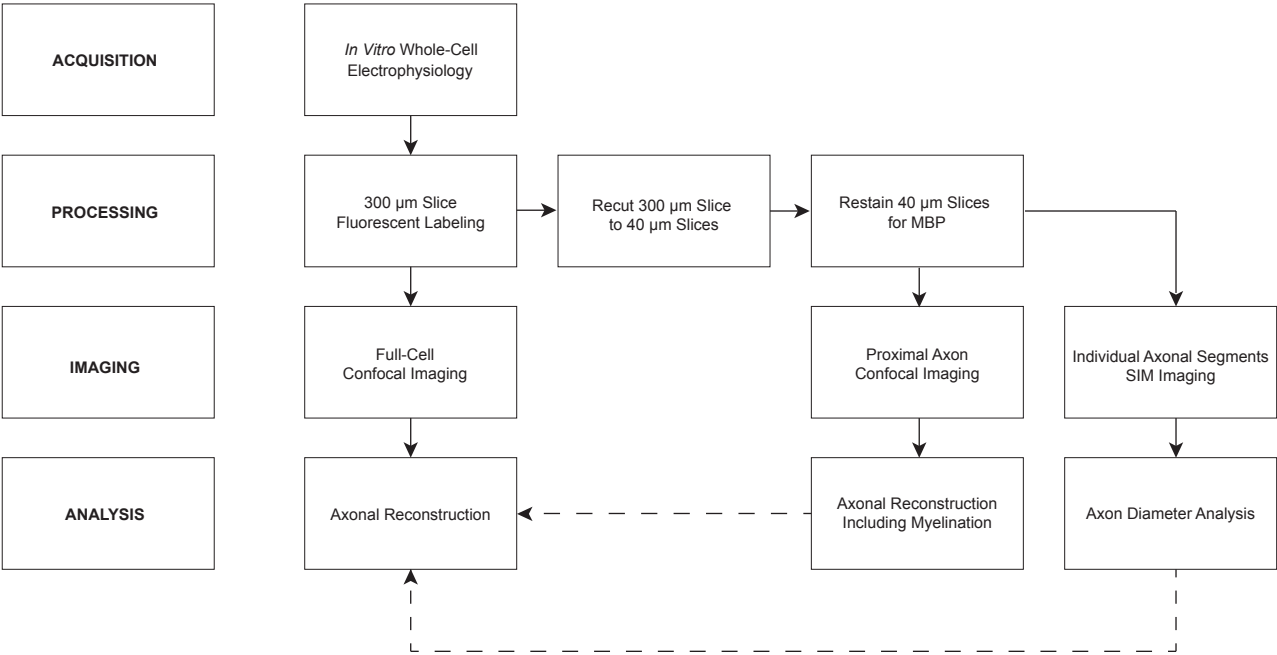

Supplement: supp [file elife_poa_e48615_Figure_1_figure_supplement_1.pdf › elife_poa_e48615_Figure_1_figure_supplement_1.pdf]

Figure 1 - Figure Supplement 2

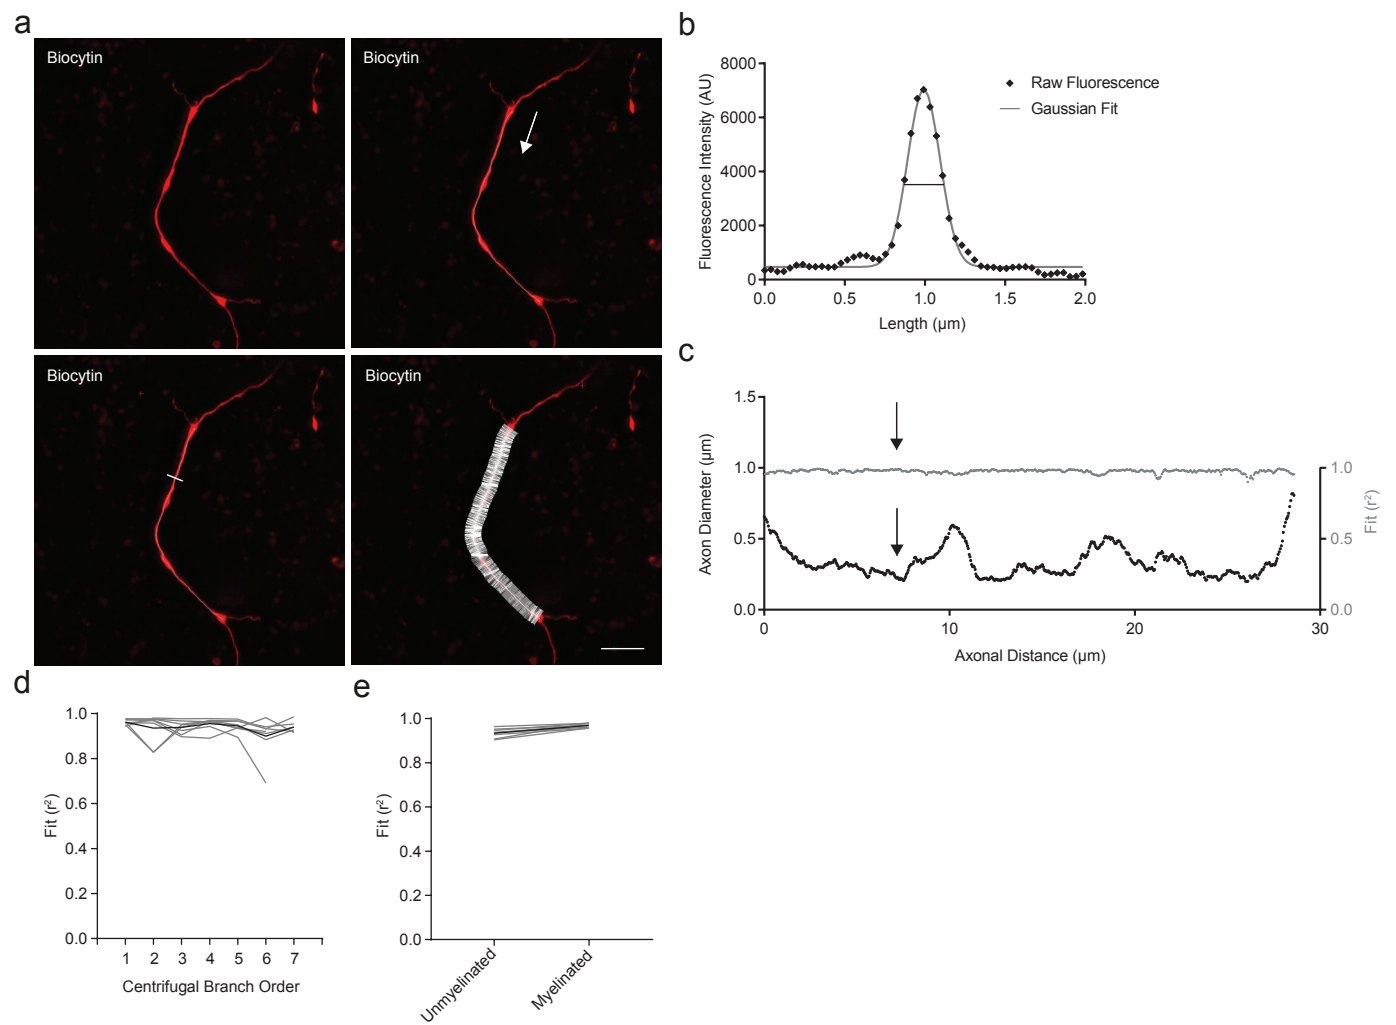

Supplement: supp [file elife_poa_e48615_Figure_1_figure_supplement_2.pdf › elife_poa_e48615_Figure_1_figure_supplement_2.pdf]

Figure 1 - Figure Supplement 3

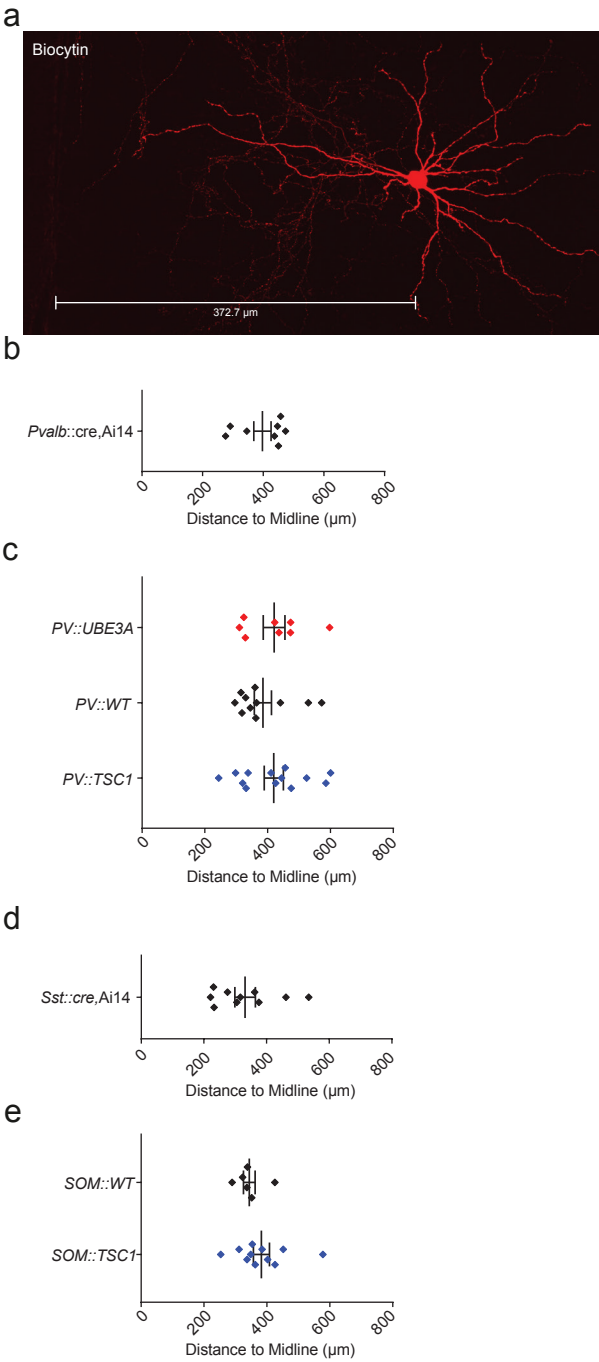

Supplement: supp [file elife_poa_e48615_Figure_1_figure_supplement_3.pdf › elife_poa_e48615_Figure_1_figure_supplement_3.pdf]

Figure 4 - Figure Supplement 1

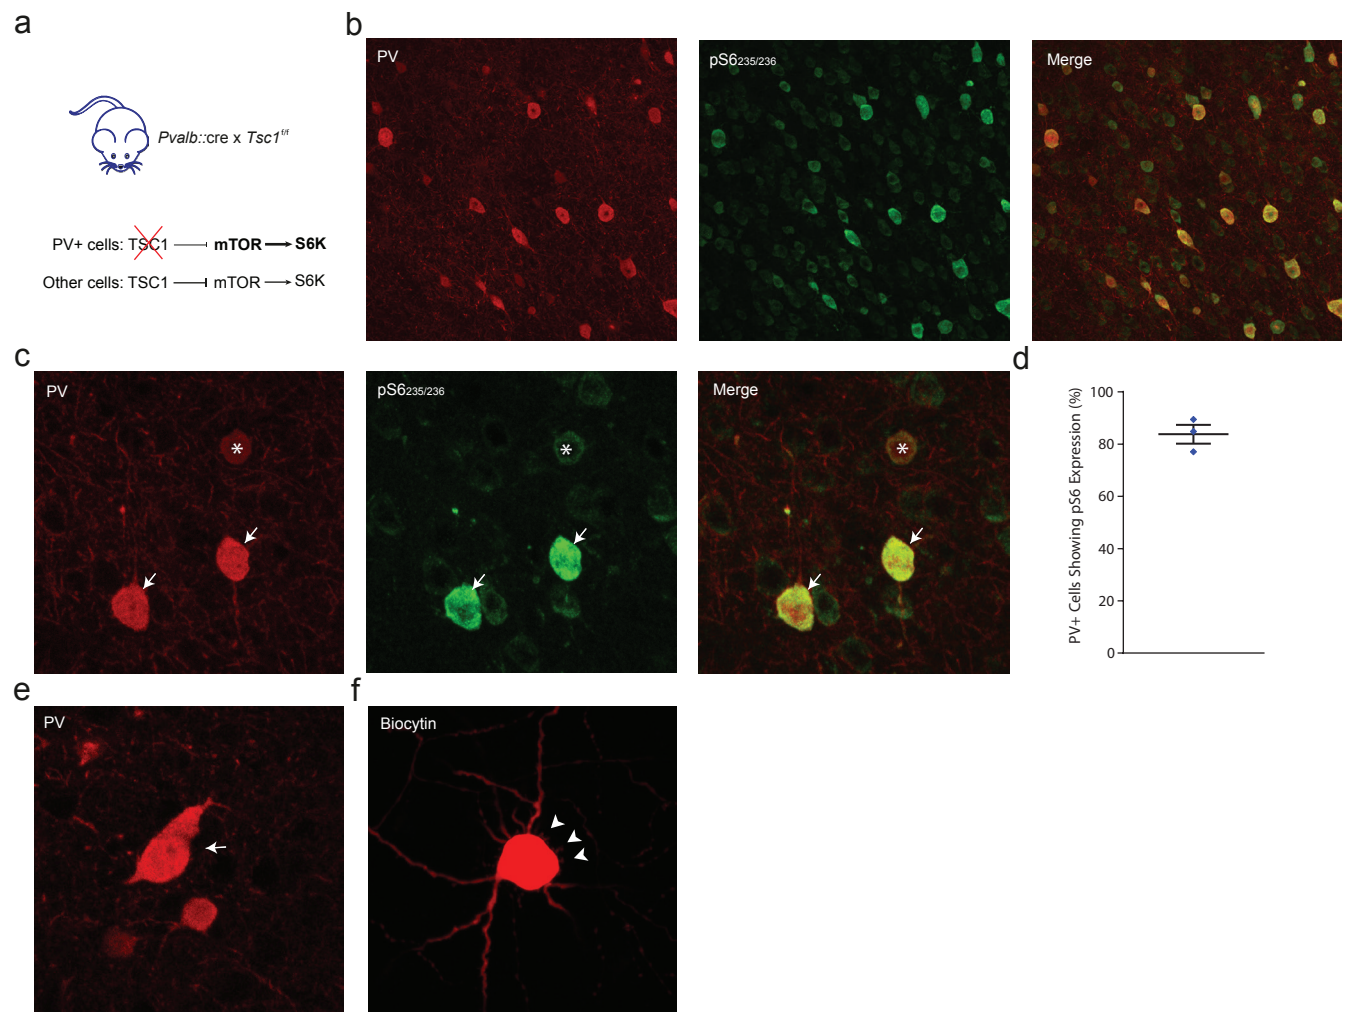

Supplement: supp [file elife_poa_e48615_Figure_4_figure_supplement_1.pdf › elife_poa_e48615_Figure_4_figure_supplement_1.pdf]

Figure 4 - Figure Supplement 2

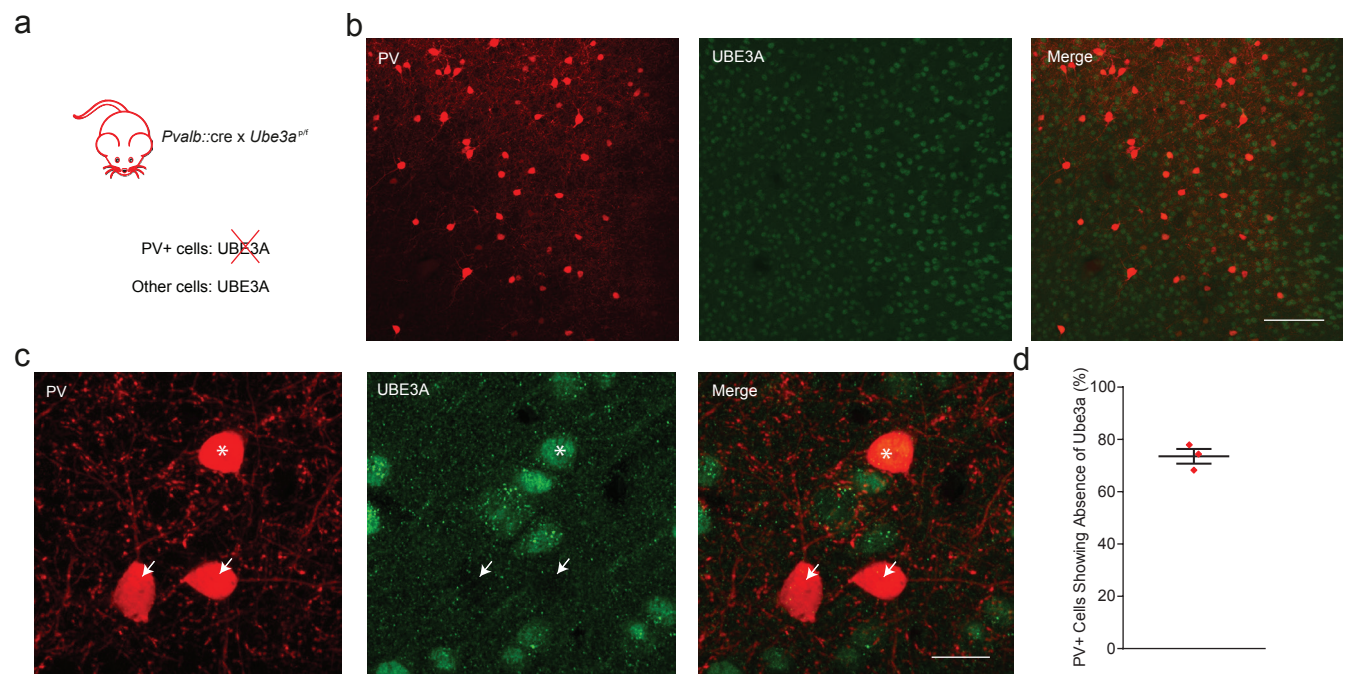

Supplement: supp [file elife_poa_e48615_Figure_4_figure_supplement_2.pdf › elife_poa_e48615_Figure_4_figure_supplement_2.pdf]

Figure 4 - Figure Supplement 3

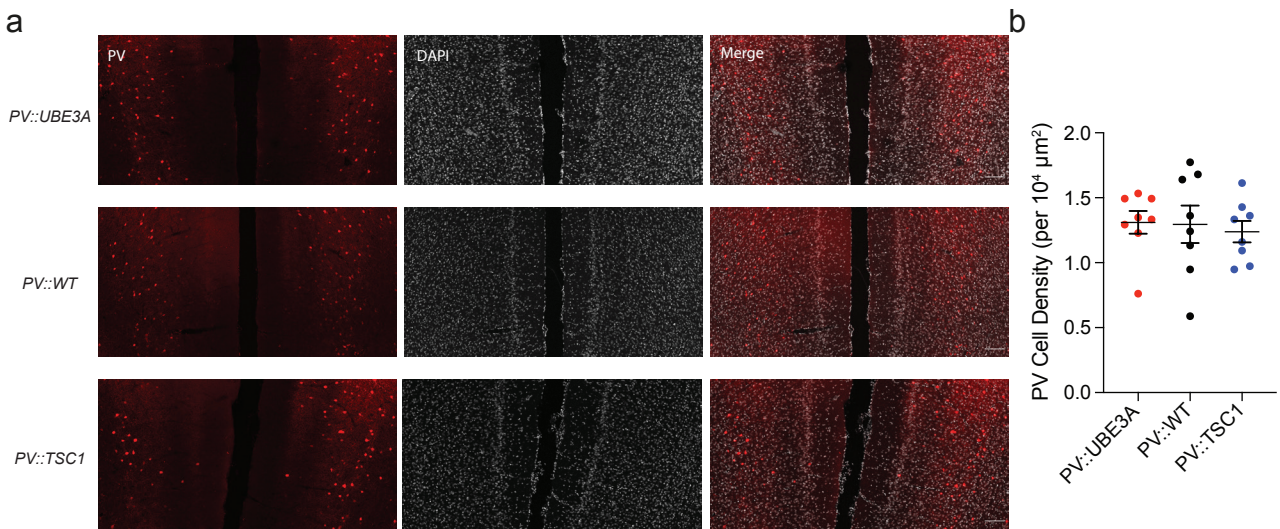

Supplement: supp [file elife_poa_e48615_Figure_4_figure_supplement_3.pdf › elife_poa_e48615_Figure_4_figure_supplement_3.pdf]

Figure 4 - Figure Supplement 4

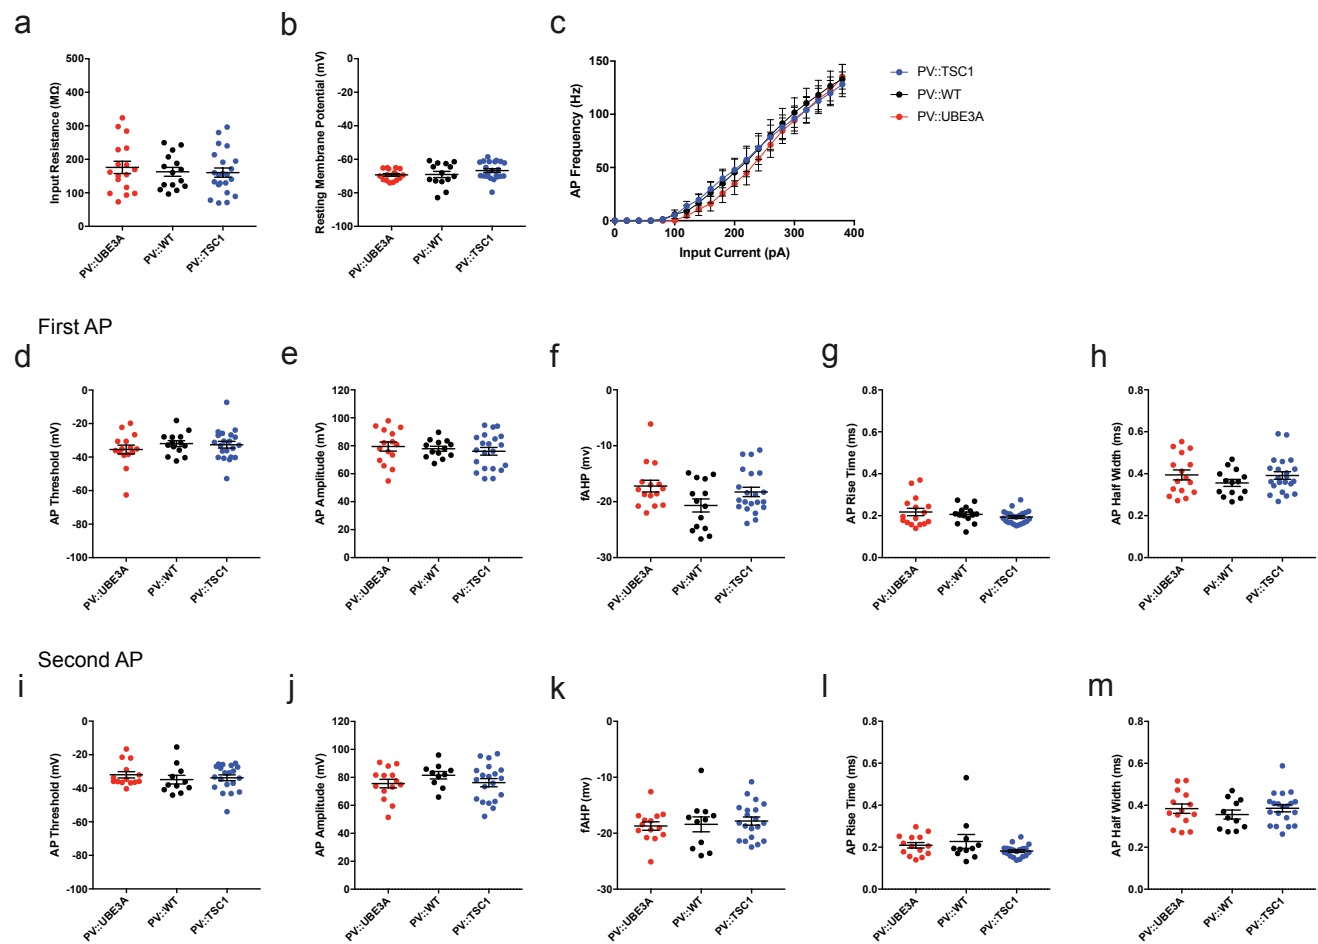

Supplement: supp [file elife_poa_e48615_Figure_4_figure_supplement_4.pdf › elife_poa_e48615_Figure_4_figure_supplement_4.pdf]

Figure 5 - Figure Supplement 1

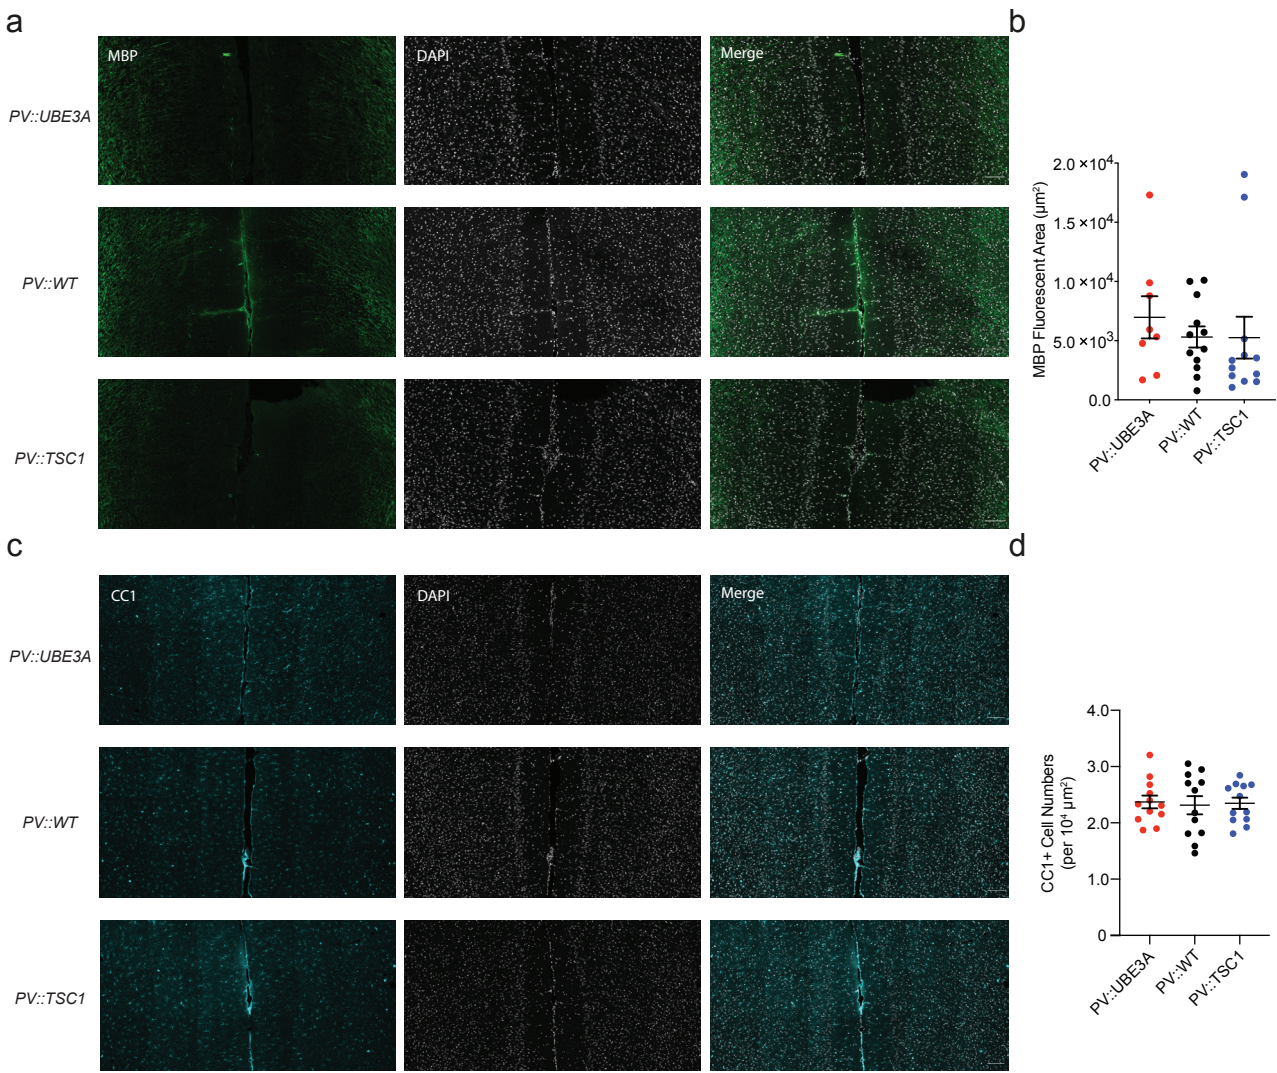

Supplement: supp [file elife_poa_e48615_Figure_5_figure_supplement_1.pdf › elife_poa_e48615_Figure_5_figure_supplement_1.pdf]

Figure 7 - Figure Supplement 1

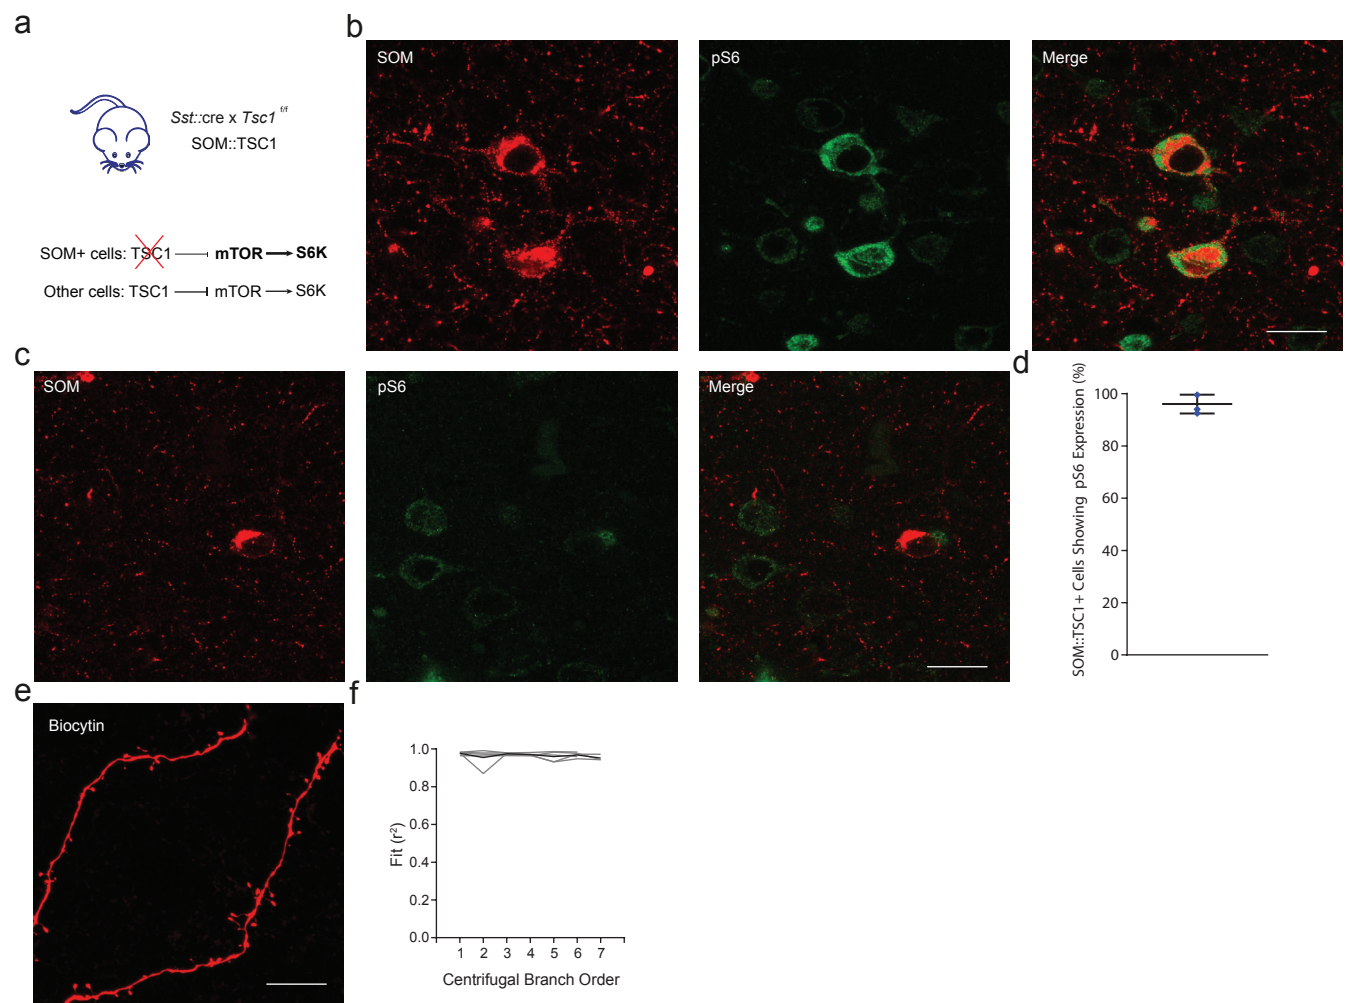

Supplement: supp [file elife_poa_e48615_Figure_7_figure_supplement_1.pdf › elife_poa_e48615_Figure_7_figure_supplement_1.pdf]

Figure 7 - Figure Supplement 2

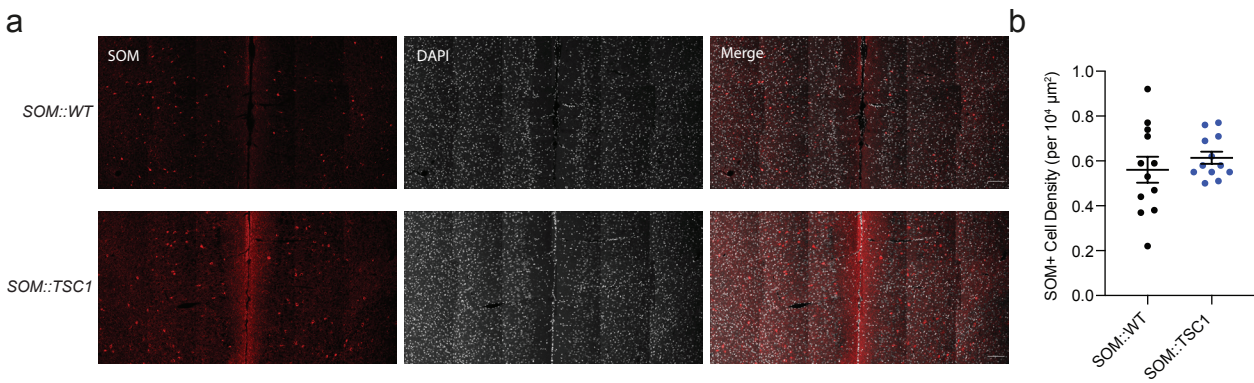

Supplement: supp [file elife_poa_e48615_Figure_7_figure_supplement_2.pdf › elife_poa_e48615_Figure_7_figure_supplement_2.pdf]

Figure 7 - Figure Supplement 3

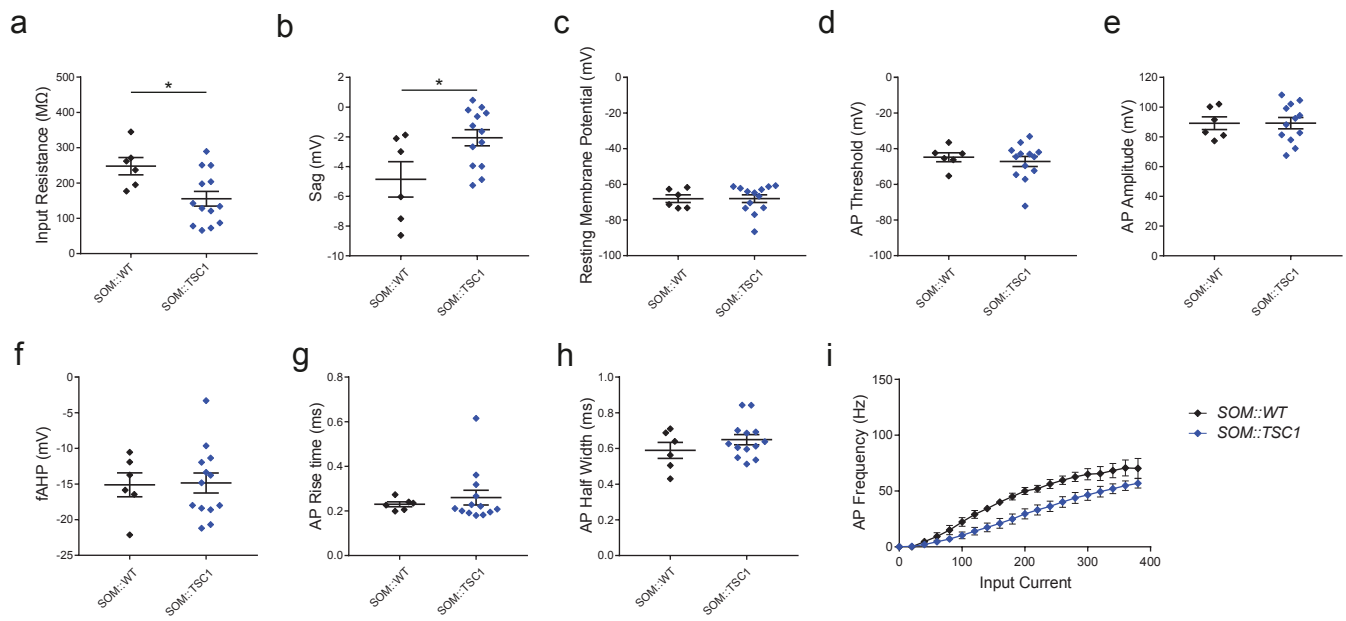

Supplement: supp [file elife_poa_e48615_Figure_7_figure_supplement_3.pdf › elife_poa_e48615_Figure_7_figure_supplement_3.pdf]
